# Supplementary material for: EdgeVolution: Democratizing Multi-Objective Neural Architecture Search and End-to-End Deployment on Microcontrollers
Source: Research Square preprint supplement (doi:10.21203/rs.3.rs-7032386/v1), 2025-10-31
Supplement: Supplementary file 1 [file 5bd3c29291eef4d0c7f15309.pdf]

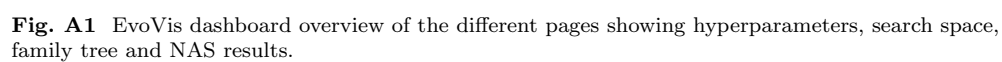

## Appendix B NAS Hyperparameters

**Listing 1** Example (Speech Commands dataset) for the hyperparameters used in *EdgeVolution*. This file must be defined for each dataset in order to be able to perform the optimization. In the future, it is conceivable that this will be abstracted to a graphical user interface.

```

### General parameters:
min_free_space_gpu: # Minimum free space in GPU in bytes to start a new training (as we train in
↳ parallel)
    value: 6_000_000
limit_tensor_arena_size: # Limit the tensor arena size in bytes (if None, it will use the maximum
↳ available tensor arena size)
    value: null

### Dataset/DNN training hyper-parameters:
results_path:
    value: "Results/"
dataset_name:
    value: "speech_commands"
sample_rate:
    value: 6000
input_shape:
    value: [6000, 1]
num_classes:
    value: 12
top_activation:
    value: "softmax"
num_epochs:
    value: 3
batch_size:
    value: 128
optimizer:
    value: "adam"
loss:
    value: "categorical_crossentropy"
metrics:
    value: ["accuracy"]

### EdgeVolution hyper-parameters:
num_generations:
    value: 30
population_size_decay:
    value: [[1, 5], [2, 250], [10, 100]] # [(from_generation, population_size), (from_generation,
↳ population_size), ...]
num_best_models_crossover_decay:
    value: [[1, 100], [2, 50], [10, 20]] # [(from_generation, population_size), (from_generation,
↳ population_size), ...]
mutation_rate_decay:
    value: [[1, 30], [2, 25], [5, 20], [10, 15]] # [(from_generation, population_size),
↳ (from_generation, population_size), ...]
max_num_feature_layers:
    value: 8
max_num_classification_layers:
    value: 4

### Fitness
min_rom_usage:
    value: 150_000
min_energy_information:
    value: 0.5
acc_weight:
    value: 0.7
rom_usage_weight:
    value: 0.1
energy_information_weight:
    value: 0.2

```

## Appendix C Search space

**Listing 1** Search space (gene pool) configuration for neural architecture search. Values are following either the scheme ["option1", "option2", "option3"] or [start, stop, step].

```
gene_pool:
  preprocessing_2D:
    - layer: STFT_2D
      f_name: STFT
      n_fft: [64, 512, 16]
      hop_length: [128, 396, 16]
      input_data_format: ['channels_last']
      output_data_format: ['channels_last']

    - layer: MAG_2D
      f_name: Magnitude()

    - layer: FB_2D
      f_name: get_filterbank_layer
      type: ['mel']
      n_mels: [32, 128, 8]
      mel_f_min: [0, 0, 1]
      mel_f_max: [3000, 3000, 1]
      output_data_format: ['channels_last']

    - layer: MAG2DEC_2D
      f_name: MagnitudeToDecibel()

  feature_extraction_2D:
    - layer: C_2D_BLOCK
      f_name: get_conv2d_block
      filters: [4, 64, 1]
      kernel_height: [1, 12, 1]
      kernel_width: [1, 12, 1]
      strides: [1, 2, 1]
      padding: ['same']
      norm_layer: ['None', 'BatchNormalization']
      activation: ['None', 'relu', 'sigmoid', 'tanh', 'leaky_relu']

    - layer: DC_2D_BLOCK
      f_name: get_depthwise_conv2d_block
      kernel_height: [1, 12, 1]
      kernel_width: [1, 12, 1]
      strides: [1, 2, 1]
      padding: ['same']
      norm_layer: ['None', 'BatchNormalization']
      activation: ['None', 'relu', 'sigmoid', 'tanh', 'leaky_relu']

    - layer: C_2D
      f_name: Conv2D
      filters: [4, 48, 1]
      kernel_size: [1, 5, 1]
      strides: [1, 2, 1]
      padding: ['same']
      activation: ['relu']

    - layer: DC_2D
      f_name: DepthwiseConv2D
      kernel_size: [1, 5, 1]
      strides: [1, 2, 1]
      padding: ['same']
      activation: ['relu']

    - layer: MP_2D
      f_name: MaxPooling2D
      pool_size: [2, 4, 1]
      padding: ['same']

    - layer: AP_2D
      f_name: AveragePooling2D
      pool_size: [2, 4, 1]
      padding: ['same']

    - layer: BN_2D
      f_name: BatchNormalization()

  global_pooling_2D:
    - layer: GAP_2D
      f_name: GlobalAveragePooling2D()

    - layer: GMP_2D
      f_name: GlobalMaxPooling2D()

  dense:
    - layer: D
      f_name: Dense
      units: [8, 64, 8]
      activation: ['relu']
```

**Listing 2** Rule set that defines how each block of the defined search space is connected with each other.

```
rule_set:
#####
# Sorted by groups. Each group is a list of layers, where 'rule' is a list of layers that can
# → be used after the current layer.
#####

Start:
  rule: ["STFT_2D"]

#####
# 2D layers
#####

STFT_2D:
  rule: ["MAG_2D"]

MAG_2D:
  rule: ["C_2D_BLOCK", "DC_2D_BLOCK", "FB_2D", "MAG2DEC_2D"]

FB_2D:
  rule: ["C_2D_BLOCK", "DC_2D_BLOCK", "MAG2DEC_2D"]

MAG2DEC_2D:
  rule: ["C_2D_BLOCK", "DC_2D_BLOCK"]

C_2D_BLOCK:
  rule: ["AP_2D", "MP_2D", "C_2D_BLOCK", "DC_2D_BLOCK"]

DC_2D_BLOCK:
  rule: ["AP_2D", "MP_2D", "C_2D_BLOCK", "DC_2D_BLOCK"]

MP_2D:
  rule: ["C_2D_BLOCK", "DC_2D_BLOCK"]

AP_2D:
  rule: ["C_2D_BLOCK", "DC_2D_BLOCK"]

GAP_2D:
  rule: ["D"]

GMP_2D:
  rule: ["D"]

#####
# Dense layers
#####

D:
  rule: ["D"]

#####
# Rule set group just for Dashboard visualization
#####
rule_set_group:
- group: "feature_extraction_2D"
  rule: ["global_pooling_2D"]
```

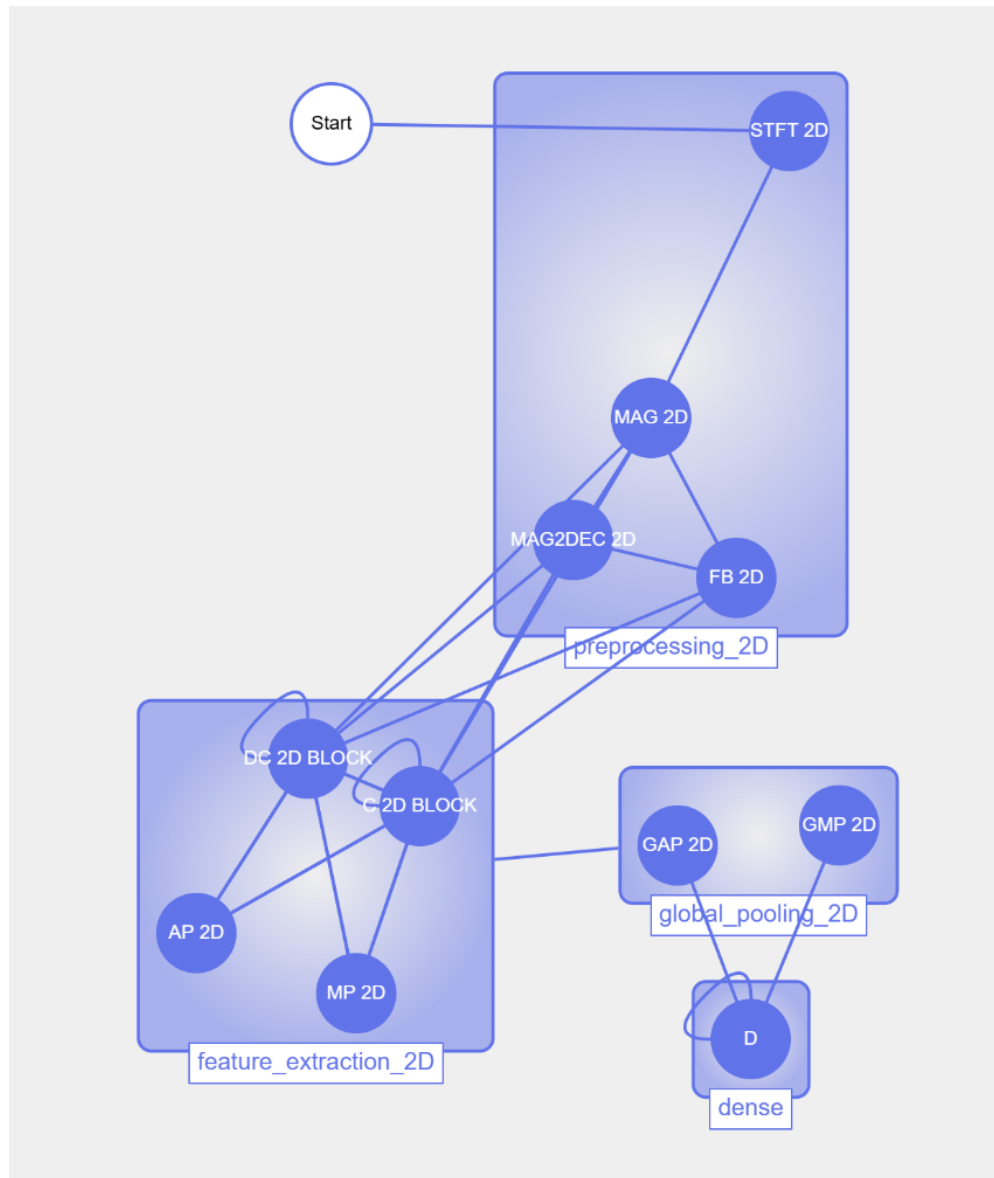

**Fig. C1** Search space visualization of the EvoVis dashboard where the search space and the rule set are both used.

## Appendix D Available operations in TFLite Micro/LiteRT

**Table D1:** List of TensorFlow Lite Micro operations with indication if the respective kernel is available in CMSIS-NN, which offers faster implementations.

| Operation            | Description                                             | CMSIS-NN |
|----------------------|---------------------------------------------------------|----------|
| Abs                  | Computes the absolute value of input tensor elements    | ×        |
| Add                  | Element-wise addition of two tensors                    | ✓        |
| AddN                 | Adds all input tensors element-wise                     | ×        |
| ArgMax               | Returns the indices of the maximum values along an axis | ×        |
| ArgMin               | Returns the indices of the minimum values along an axis | ×        |
| AssignVariable       | Assigns a value to a variable                           | ×        |
| AveragePool2D        | Performs average pooling on the input                   | ✓        |
| BatchMatMul          | Performs batch matrix multiplication                    | ✓        |
| BatchToSpaceNd       | Reshapes batch dimension into spatial dimensions        | ×        |
| BroadcastArgs        | Returns the shape of broadcasted tensors                | ×        |
| BroadcastTo          | Broadcasts an array to a compatible shape               | ×        |
| CallOnce             | Calls a function once                                   | ×        |
| Cast                 | Casts a tensor to a new type                            | ×        |
| Ceil                 | Computes ceiling of elements in the input tensor        | ×        |
| CircularBuffer       | Implements a circular buffer data structure             | ×        |
| Concatenation        | Concatenates tensors along one dimension                | ×        |
| Conv2D               | Performs 2D convolution                                 | ✓        |
| Cos                  | Computes cosine of input elements                       | ×        |
| CumSum               | Computes the cumulative sum of elements along an axis   | ×        |
| Delay                | Signal processing operation that introduces time delay  | ×        |
| DepthToSpace         | Rearranges depth data into spatial dimensions           | ×        |
| DepthwiseConv2D      | Performs depthwise 2D convolution                       | ✓        |
| Dequantize           | Converts quantized tensors back to floating-point       | ×        |
| DetectionPostprocess | Post-processing for object detection models             | ×        |

Continued on next page

Table D1 – Continued from previous page

| Operation                     | Description                                        | CMSIS-NN |
|-------------------------------|----------------------------------------------------|----------|
| Div                           | Element-wise division of two tensors               | ×        |
| EmbeddingLookup               | Looks up embeddings for specified IDs              | ×        |
| Energy                        | Computes signal energy in signal processing        | ×        |
| Elu                           | Exponential Linear Unit activation function        | ×        |
| Equal                         | Element-wise equality comparison                   | ×        |
| EthosU                        | Operations for Arm Ethos-U NPU                     | ×        |
| Exp                           | Computes exponential of input elements             | ×        |
| ExpandDims                    | Expands tensor dimensions by inserting a dimension | ×        |
| FftAutoScale                  | Auto-scales Fast Fourier Transform output          | ×        |
| Fill                          | Creates a tensor filled with a scalar value        | ×        |
| FilterBank                    | Applies filter bank in signal processing           | ×        |
| FilterBankLog                 | Applies logarithmic filter bank                    | ×        |
| FilterBankSquareRoot          | Applies square root to filter bank outputs         | ×        |
| FilterBankSpectralSubtraction | Applies spectral subtraction to filter bank        | ×        |
| Floor                         | Computes floor of elements in the input tensor     | ×        |
| FloorDiv                      | Integer division with floor operation              | ×        |
| FloorMod                      | Returns element-wise remainder of division         | ×        |
| Framer                        | Frames a signal into overlapping windows           | ×        |
| FullyConnected                | Performs fully connected layer operations          | ✓        |
| Gather                        | Gathers slices from params tensor                  | ×        |
| GatherNd                      | Gathers slices from params tensor at indices       | ×        |
| Greater                       | Element-wise greater than comparison               | ×        |
| GreaterEqual                  | Element-wise greater than or equal comparison      | ×        |
| HardSwish                     | Hard version of swish activation function          | ×        |
| If                            | Conditional execution of subgraphs                 | ×        |
| Irfft                         | Inverse real Fast Fourier Transform                | ×        |
| L2Normalization               | L2 normalization of input tensor                   | ×        |
| L2Pool2D                      | L2 pooling operation                               | ×        |
| LeakyRelu                     | Leaky version of ReLU activation function          | ×        |
| Less                          | Element-wise less than comparison                  | ×        |
| LessEqual                     | Element-wise less than or equal comparison         | ×        |
| Log                           | Computes natural logarithm of input elements       | ×        |
| LogicalAnd                    | Element-wise logical AND operation                 | ×        |
| LogicalNot                    | Element-wise logical NOT operation                 | ×        |

Continued on next page

Table D1 – Continued from previous page

| Operation             | Description                                          | CMSIS-NN |
|-----------------------|------------------------------------------------------|----------|
| LogicalOr             | Element-wise logical OR operation                    | ×        |
| Logistic              | Computes sigmoid activation function                 | ×        |
| LogSoftmax            | Computes log softmax activation function             | ×        |
| Maximum               | Element-wise maximum of two tensors                  | ✓        |
| MaxPool2D             | Performs max pooling on the input                    | ✓        |
| MirrorPad             | Pads a tensor using mirroring                        | ×        |
| Mean                  | Computes mean of elements across dimensions          | ×        |
| Minimum               | Element-wise minimum of two tensors                  | ✓        |
| Mul                   | Element-wise multiplication of two tensors           | ✓        |
| Neg                   | Negates the value of each element                    | ×        |
| NotEqual              | Element-wise inequality comparison                   | ×        |
| OverlapAdd            | Reconstructs signal from overlapped frames           | ×        |
| Pack                  | Packs a list of tensors into a single tensor         | ×        |
| Pad                   | Pads a tensor with a constant value                  | ✓        |
| PadV2                 | Extended version of Pad with more options            | ×        |
| PCAN                  | Per-Channel Affine Normalization for audio           | ×        |
| Prelu                 | Parametric Rectified Linear Unit activation          | ×        |
| Quantize              | Quantizes a tensor from floating-point to integer    | ×        |
| ReadVariable          | Reads the value of a variable                        | ×        |
| ReduceMax             | Computes maximum of elements across dimensions       | ×        |
| Relu                  | Rectified Linear Unit activation function            | ×        |
| Relu6                 | ReLU capped at 6 activation function                 | ×        |
| Reshape               | Changes the shape of a tensor                        | ×        |
| ResizeBilinear        | Resizes images using bilinear interpolation          | ×        |
| ResizeNearestNeighbor | Resizes images using nearest neighbor interpolation  | ×        |
| Rfft                  | Real Fast Fourier Transform                          | ×        |
| Round                 | Rounds values to the nearest integer                 | ×        |
| Rsqrt                 | Computes reciprocal square root                      | ×        |
| SelectV2              | Selects elements from two tensors based on condition | ×        |
| Shape                 | Returns shape of a tensor                            | ×        |
| Sin                   | Computes sine of input elements                      | ×        |
| Slice                 | Extracts a slice from a tensor                       | ×        |
| Softmax               | Computes softmax activation function                 | ✓        |

Continued on next page



Table D1 – Continued from previous page

| Operation                  | Description                                           | CMSIS-NN |
|----------------------------|-------------------------------------------------------|----------|
| SpaceToBatchNd             | Reshapes spatial dimensions into batch dimension      | ×        |
| SpaceToDepth               | Rearranges spatial data into depth dimension          | ×        |
| Split                      | Splits a tensor into sub-tensors along a dimension    | ×        |
| SplitV                     | Splits a tensor into sub-tensors with specified sizes | ×        |
| Squeeze                    | Removes dimensions of size 1 from the tensor shape    | ×        |
| Sqrt                       | Computes square root of input elements                | ×        |
| Square                     | Computes square of input elements                     | ×        |
| SquaredDifference          | Computes squared difference between two tensors       | ×        |
| StridedSlice               | Extracts a strided slice from a tensor                | ×        |
| Stacker                    | Stacks frames for signal processing                   | ×        |
| Sub                        | Element-wise subtraction of two tensors               | ×        |
| Sum                        | Computes sum of elements across dimensions            | ×        |
| Svdf                       | Singular Value Decomposition Filter operation         | ✓        |
| Tanh                       | Computes hyperbolic tangent of input elements         | ×        |
| TransposeConv              | Performs transposed 2D convolution                    | ✓        |
| Transpose                  | Permutates dimensions of a tensor                     | ✓        |
| Unpack                     | Unpacks a tensor into a list of tensors               | ×        |
| UnidirectionalSequenceLSTM | Applies LSTM to an input sequence                     | ✓        |
| VarHandle                  | Creates a resource variable handle                    | ×        |
| While                      | Executes a subgraph repeatedly                        | ×        |
| Window                     | Applies window function to signal frames              | ×        |
| ZerosLike                  | Creates a tensor of zeros with same shape as input    | ×        |

## Appendix E Visualization of optimization decays

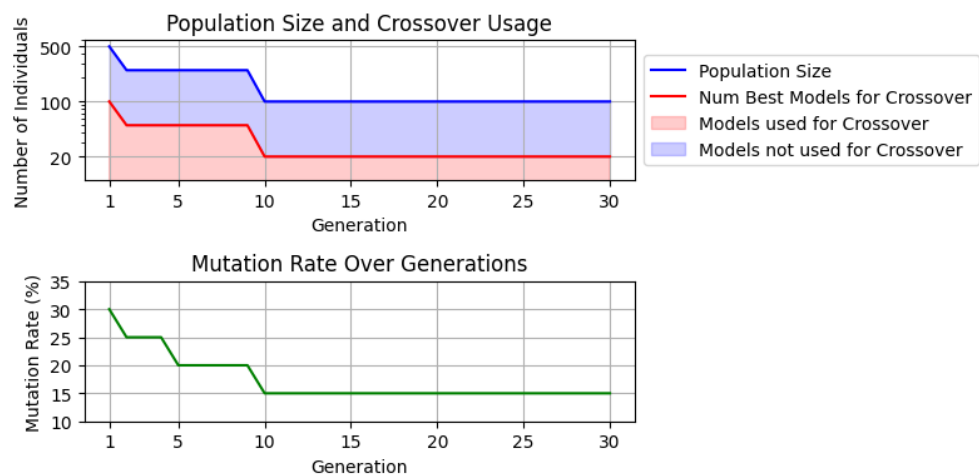

**Fig. E1** Visualization of the decays used for population size and mutation rate. These are hyperparameter that are specified in the config file as well.

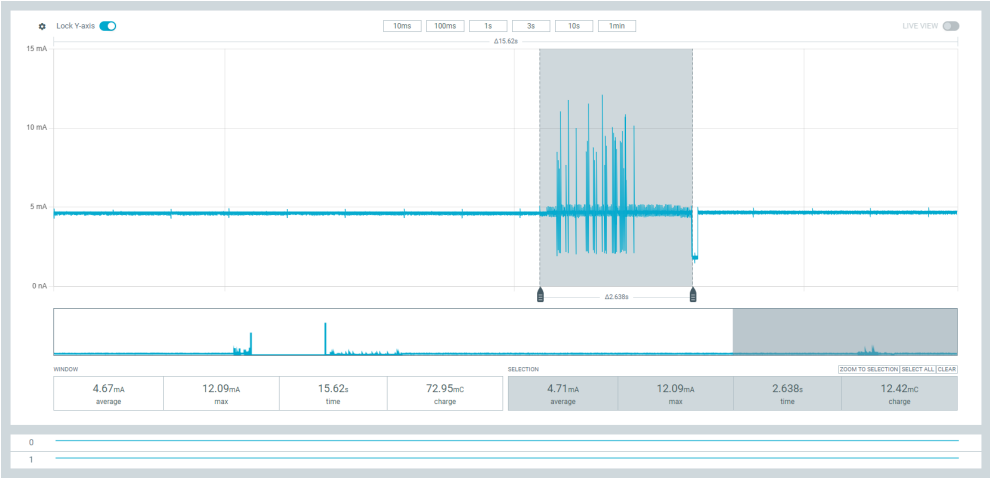

**Fig. F1** Visualization of the current consumption measurement. The microcontroller is in an active/idle mode with a baseline current consumption visually around 4.6 mA. During inference (selected period), the average current consumption is 4.71 mA over 2.638 s, resulting in a measured charge of 12.42 mC. This data is then used to calculate the energy consumption with the supply voltage of 3.3 V. Directly after inference ends, the microcontroller is set to sleep for 100 ms (indicated by the sharp drop in current).

964

965

Appendix G

Statistical Testing of Mel-Scaling usage

**Table G1** Shapiro-Wilk Test Results for Normality and Statistical Significance of Validation Accuracy

| Normality (No n_mels)                | Normality (Has n_mels)               | Significance (Val_Acc)              |
|--------------------------------------|--------------------------------------|-------------------------------------|
| Worst 25%                            |                                      |                                     |
| False ( $p = 3.43 \times 10^{-37}$ ) | False ( $p = 4.71 \times 10^{-22}$ ) | True ( $p = 1.12 \times 10^{-23}$ ) |
| Middle 50%                           |                                      |                                     |
| False ( $p = 5.68 \times 10^{-41}$ ) | False ( $p = 2.14 \times 10^{-8}$ )  | True ( $p = 2.24 \times 10^{-7}$ )  |
| Best 25%                             |                                      |                                     |
| False ( $p = 2.72 \times 10^{-29}$ ) | True ( $p = 0.216$ )                 | True ( $p = 0.00179$ )              |
